# Supplementary material for: Feasibility study of computed tomography texture analysis for evaluation of canine primary adrenal gland tumors
Source: Frontiers journal article supplement (doi:10.3389/fvets.2023.1126165), 2023-08-30
Supplement: Data_Sheet_1.pdf [file Data_Sheet_1.pdf]

## *Supplementary Material*

# **Feasibility Study of Computed Tomography Texture Analysis for Evaluation of Canine Primary Adrenal Tumors**

**Kyungsoo Lee, Jinhyung Goh, Jaeyoung Jang, Jeongyeon Hwang, Jungmin Kwak, Jaehwan Kim, Kidong Eom\***

\* Correspondence: [eomkd@konkuk.ac.kr](mailto:eomkd@konkuk.ac.kr)

## **1 Supplementary Tables**

**Supplementary Table 1.** Computed tomography scanning parameters

|   | CT scanner                          | Tube voltage (kVp) | mAs                                                    | Slice thickness (mm)                |
|---|-------------------------------------|--------------------|--------------------------------------------------------|-------------------------------------|
| 1 | General Electric Brivo CT385 series | 120                | 69                                                     | 1.25                                |
| 2 | General Electric Lightspeed plus    | 120                | 200                                                    | 1.30                                |
| 3 | General Electric Revolution ACT     | 120                | 85                                                     | 2.50                                |
| 4 | Toshiba Aquilion                    | 120                | 250                                                    | 2.0                                 |
| 5 | Toshiba Aquilion Lightning          | 120                | 150                                                    | 1.0                                 |
|   |                                     | 120                | 180 <sup>a</sup> , 150 <sup>b</sup>                    | 1.0                                 |
| 6 | Siemens Somatom go.Now              | 130                | 113 <sup>a</sup> , 125 <sup>b</sup>                    | 2.0 <sup>a</sup> , 1.0 <sup>b</sup> |
|   |                                     | 130                | 111                                                    | 1.5                                 |
| 7 | Siemens Emotion 16                  | 130                | 147 <sup>a</sup> , 140 <sup>c</sup> , 129 <sup>b</sup> | 1.0                                 |
| 8 | Siemens Somatom Scope               | 130                | 147 <sup>a</sup> , 165 <sup>b</sup>                    | 2.0                                 |
| 9 | Philips Access CT                   | 120                | 150                                                    | 1.0                                 |

<sup>a</sup> Precontrast, <sup>b</sup> delayed phase, <sup>c</sup> arterial and portal phases.  
CT, computed tomography.

**Supplementary Table 2.** Age and sex of the dogs

|             |                | AA (n = 12) | ACC (n = 7) | PHEO (n = 6) | <i>p</i> -value |
|-------------|----------------|-------------|-------------|--------------|-----------------|
| Age (years) |                | 10.6 ± 2.3  | 10.0 ± 1.7  | 9.7 ± 1.0    | 0.62            |
| Sex         | Castrated male | 5 (41.7%)   | 3 (42.8%)   | 4 (66.7%)    | 0.67            |
|             | Spayed female  | 7 (58.3%)   | 4 (57.2%)   | 2 (33.3%)    |                 |

Ages are presented as mean ± standard deviation.

A *p*-value <0.05 was considered statistically significant.

AA, adenoma; ACC, adenocarcinoma; PHEO, pheochromocytoma.

**Supplementary Table 3.** Quantitative computed tomography features for distinguishing the adrenal tumor types

|                                         | AA (n = 12)    | ACC (n = 7)    | PHEO (n = 6)              | <i>p</i> -value           |       |
|-----------------------------------------|----------------|----------------|---------------------------|---------------------------|-------|
| Maximal diameter in the short axis (mm) | 20.85 ± 6.07   | 16.65 ± 2.89   | 23.57 ± 7.82              | 0.51                      |       |
| Maximal diameter in the long axis (mm)  | 26.48 ± 5.14   | 23.67 ± 6.42   | 28.44 ± 5.17              | 0.83                      |       |
| HUmean                                  | Precontrast    | 37.91 ± 8.41   | 29.51 ± 5.57 <sup>a</sup> | 46.43 ± 7.30 <sup>a</sup> | 0.004 |
|                                         | Arterial phase | 50.85 ± 20.15  | 60.54 ± 17.43             | 66.34 ± 23.26             | 0.52  |
|                                         | Portal phase   | 75.97 ± 43.21  | 105.87 ± 54.26            | 87.70 ± 48.05             | 0.54  |
|                                         | Delayed phase  | 101.92 ± 45.13 | 108.77 ± 50.37            | 119.03 ± 39.01            | 0.75  |

All data are presented as mean ± standard deviation.

A *p*-value <0.05 was considered statistically significant. <sup>a</sup> There is a significant difference between the two tumor types.

AA, adenoma; ACC, adenocarcinoma; PHEO, pheochromocytoma; HUmean, mean Hounsfield unit value

**Supplementary Table 3.** Quantitative computed tomography features for distinguishing the adrenal tumor types (continued)

|       |                | AA (n = 12)    | ACC (n = 7)                | PHEO (n = 6)               | <i>p</i> -value |
|-------|----------------|----------------|----------------------------|----------------------------|-----------------|
| HUmax | Precontrast    | 62.50 ± 12.07  | 52.87 ± 10.85 <sup>a</sup> | 71.33 ± 11.57 <sup>a</sup> | 0.03            |
|       | Arterial phase | 122.50 ± 13.05 | 141.80 ± 64.85             | 249.50 ± 31.81             | 0.053           |
|       | Portal phase   | 164.44 ± 72.03 | 198.20 ± 86.07             | 251.50 ± 91.21             | 0.36            |
|       | Delayed phase  | 166.50 ± 53.17 | 171.00 ± 53.89             | 186.33 ± 50.66             | 0.64            |
| HUmin | Precontrast    | 14.66 ± 10.86  | 6.42 ± 6.24                | 17.66 ± 10.42              | 0.16            |
|       | Arterial phase | 10.00 ± 14.04  | 15.60 ± 12.17              | 30.00 ± 15.55              | 0.21            |
|       | Portal phase   | 23.55 ± 19.15  | 28.80 ± 19.03              | 34.00 ± 19.42              | 0.77            |
|       | Delayed phase  | 38.41 ± 42.90  | 51.00 ± 43.79              | 57.50 ± 30.15              | 0.76            |

All data are presented as mean ± standard deviation.

A *p*-value <0.05 was considered statistically significant. <sup>a</sup> There is a significant difference between the two tumor types.

AA, adenoma; ACC, adenocarcinoma; PHEO, pheochromocytoma; HUmax, maximum Hounsfield unit value; HUmin, minimum Hounsfield unit value.

**Supplementary Table 3.** Quantitative computed tomography features for distinguishing the adrenal tumor types (continued)

|                    |                | AA (n = 12)   | ACC (n = 7)   | PHEO (n = 6)  | <i>p</i> -value |
|--------------------|----------------|---------------|---------------|---------------|-----------------|
| Mean HU difference | Arterial phase | 14.97 ± 17.30 | 29.26 ± 21.53 | 18.12 ± 22.59 | 0.45            |
|                    | Portal phase   | 43.69 ± 29.85 | 76.71 ± 60.56 | 39.48 ± 47.38 | 0.37            |
|                    | Delayed phase  | 64.01 ± 41.47 | 79.26 ± 55.51 | 72.60 ± 35.98 | 0.76            |

All data are presented as mean ± standard deviation.

A *p*-value <0.05 was considered statistically significant.

AA, adenoma; ACC, adenocarcinoma; PHEO, pheochromocytoma; HU, Hounsfield unit.

**Supplementary Table 4.** Qualitative computed tomography features for distinguishing the adrenal tumor types

|                            |           | AA (n = 12)   | ACC (n = 7) | PHEO (n = 6) | <i>p</i> -value |
|----------------------------|-----------|---------------|-------------|--------------|-----------------|
| Tumor location             | Right     | 7/12 (58.3%)  | 3/7 (42.8%) | 4/6 (66.7%)  | 0.76            |
|                            | Left      | 5/12 (42.7%)  | 4/7 (57.2%) | 2/6 (33.3%)  |                 |
| Tumor shape                | Round     | 2/12 (16.7%)  | -           | -            | 0.56            |
|                            | Oval      | 1/12 (8.3%)   | 1/7 (14.3%) | 2/6 (33.3%)  |                 |
|                            | Lobulated | 9/12 (75.0%)  | 6/7 (85.7%) | 4/6 (66.7%)  |                 |
| Tumor contour              | Smooth    | 12/12 (100%)  | 1/7 (14.3%) | 4/6 (66.7%)  | 0.07            |
|                            | Irregular | -             | 6/7 (85.7%) | 2/6 (33.3%)  |                 |
| Intratumoral calcification | Absent    | 11/12 (91.6%) | 5/7 (71.4%) | 4/6 (66.7%)  | 0.45            |
|                            | Present   | 1/12 (8.4%)   | 2/7 (28.6%) | 2/6 (33.3%)  |                 |

A *p*-value <0.05 was considered statistically significant.

AA, adenoma; ACC, adenocarcinoma; PHEO, pheochromocytoma.

**Supplementary Table 4.** Qualitative computed tomography features for distinguishing the adrenal tumor types (continued)

|                                                            |                    | AA (n = 12)  | ACC (n=7)   | PHEO (n = 6) | <i>p</i> -value |
|------------------------------------------------------------|--------------------|--------------|-------------|--------------|-----------------|
| Possibility of adhesion or invasion of the adjacent vessel | Weak or no contact | 4/12 (33.3%) | 4/7 (57.2%) | 1/6 (16.7%)  | 0.32            |
|                                                            | Moderate           | 8/12 (66.7%) | 3/7 (42.8%) | 5/6 (83.3%)  |                 |
|                                                            | Strong             | -            | -           | -            |                 |
| Type of CE at precontrast                                  | Homogeneous        | 5/12 (41.7%) | 2/7 (28.6%) | 2/6 (33.3%)  | 0.87            |
|                                                            | Heterogeneous      | 7/12 (58.3%) | 5/7 (71.4%) | 4/6 (66.7%)  |                 |
| Type of CE in the arterial phase                           | Homogeneous        | -            | -           | -            | -               |
|                                                            | Heterogeneous      | 8/8 (100%)   | 4/4 (100%)  | 2/2 (100%)   |                 |
| Type of CE in the portal phase                             | Homogeneous        | -            | -           | -            | -               |
|                                                            | Heterogeneous      | 8/8 (100%)   | 4/4 (100%)  | 5/5 (100%)   |                 |
| Type of CE in the delayed phase                            | Homogeneous        | -            | -           | -            | -               |
|                                                            | Heterogeneous      | 12/12 (100%) | 7/7 (100%)  | 6/6 (100%)   |                 |
| Rim enhancement                                            | Absent             | 8/12 (66.7%) | 3/7 (42.8%) | 5/6 (83.3%)  | 0.32            |
|                                                            | Present            | 4/12 (33.3%) | 4/7 (57.2%) | 1/6 (16.7%)  |                 |

A *p*-value <0.05 is considered statistically significant.

AA, adenoma; ACC, adenocarcinoma; PHEO, pheochromocytoma; CE, contrast enhancement.



**Supplementary Table 4.** Qualitative computed tomography features for distinguishing the adrenal tumor types (continued)

|                                    |             | AA (n = 12)  | ACC (n = 7) | PHEO (n = 6) | <i>p</i> -value |
|------------------------------------|-------------|--------------|-------------|--------------|-----------------|
| Pattern of CE                      | Stable      | 4/12 (33.3%) | 2/7 (28.6%) | -            | 1.00            |
|                                    | Progressive | 7/12 (58.3%) | 5/7 (71.4%) | 2/2 (100%)   |                 |
|                                    | Washout     | 1/12 (8.4%)  | -           | -            |                 |
| Degree of CE in the arterial phase | Minimal     | 8/8 (100%)   | 4/5 (80.0%) | 2/2 (100%)   | 0.46            |
|                                    | Moderate    | -            | 1/5 (20.0%) | -            |                 |
|                                    | Intense     | -            | -           | -            |                 |
| Degree of CE in the portal phase   | Minimal     | 4/9 (44.4%)  | 2/5 (40.0%) | 1/2 (50.0%)  | 0.51            |
|                                    | Moderate    | 5/9 (45.6%)  | 2/5 (40.0%) | 1/2 (50.0%)  |                 |
|                                    | Intense     | -            | 1/5 (20%)   | -            |                 |
| Degree of CE in the delayed phase  | Minimal     | 3/12 (25.0%) | 1/7 (14.3%) | 1/6 (16.7%)  | 0.46            |
|                                    | Moderate    | 7/12 (58.3%) | 5/7 (71.4%) | 4/6 (6.6%)   |                 |
|                                    | Intense     | 2/12 (16.7%) | 1/7 (14.3%) | 1/6 (16.7%)  |                 |

A *p*-value <0.05 was considered statistically significant.

AA, adenoma; ACC, adenocarcinoma; PHEO, pheochromocytoma; CE, contrast enhancement.

**Supplementary Table 5.** Radiomic features with a significant difference between the adrenal tumor types on precontrast images

| Radiomic feature |             | AA (n = 10)                        | ACC (n = 5)                          | PHEO (n = 3)                         | <i>p</i> -value |
|------------------|-------------|------------------------------------|--------------------------------------|--------------------------------------|-----------------|
| GLCM             | Correlation | 0.53 [0.45, 0.61] <sup>a*</sup>    | 0.41 [0.39, 0.52] <sup>a*, b</sup>   | 0.59 [0.53, 0.60] <sup>b</sup>       | 0.013           |
|                  | IMC 1       | -0.20 [-0.24, -0.17] <sup>a*</sup> | -0.15 [-0.18, -0.13] <sup>a*</sup>   | -0.22 [-0.23, -0.17]                 | 0.014           |
|                  | IMC 2       | 0.60 [0.47, 0.67] <sup>a</sup>     | 0.49 [0.44, 0.57] <sup>a</sup>       | 0.64 [0.54, 0.65]                    | 0.036           |
|                  | MCC         | 0.59 [0.49, 0.66] <sup>a*</sup>    | 0.48 [0.44, 0.54] <sup>a*, b</sup>   | 0.63 [0.61, 0.65] <sup>b</sup>       | 0.006           |
| GLDM             | LGLE        | 0.02 [0.02, 0.05]                  | 0.05 [0.03, 0.05] <sup>b</sup>       | 0.02 [0.02, 0.02] <sup>b</sup>       | 0.038           |
|                  | SDLGLE      | 0.0013 [0.0005, 0.0023]            | 0.0018 [0.0012, 0.0026] <sup>b</sup> | 0.0007 [0.0006, 0.0011] <sup>b</sup> | 0.032           |
| GLRLM            | Run entropy | 4.22 [3.99, 4.44] <sup>a</sup>     | 4.03 [3.92, 4.12] <sup>a</sup>       | 4.20 [4.08, 4.27]                    | 0.031           |
| GLSZM            | GLNUN       | 0.18 [0.17, 0.25] <sup>a*</sup>    | 0.22 [0.21, 0.26] <sup>a*, b</sup>   | 0.18 [0.16, 0.20] <sup>b</sup>       | 0.017           |

All data are presented as median and range (minimum, maximum)

A *p*-value <0.05 was considered statistically significant. \* *p*<0.01. <sup>a, b</sup> The same superscript letter indicates a significant difference between the two tumor types.

AA, adenoma; ACC, adenocarcinoma; PHEO, pheochromocytoma; GLCM, gray level co-occurrence matrix; GLDM, gray-level dependence matrix; GLRLM, gray-level run length matrix; GLSZM, gray-level size zone matrix; IMC1, informational measure of correlation 1; IMC2,

informational measure of correlation 2; MCC, maximum correlation coefficient; LGLE, low gray-level emphasis; SDLGLE, small dependence low gray-level emphasis; GLNUN, gray-level non-uniformity normalized.

**Supplementary Table 6.** The cut-off value of HUmean and HUmax on precontrast images for distinguishing adrenal tumor types

|                       |                     | Cut-off value | Sensitivity (%) | Specificity (%) |
|-----------------------|---------------------|---------------|-----------------|-----------------|
| HUmean on precontrast | ACC vs. AA and PHEO | $\leq 32.47$  | 85.71           | 77.78           |
|                       | PHEO vs. AA and ACC | $> 45.21$     | 83.33           | 94.74           |
| HUmax on precontrast  | ACC vs. AA and PHEO | $\leq 63$     | 100             | 61.11           |
|                       | PHEO vs. AA and ACC | $> 71$        | 66.67           | 94.74           |

AA, adenoma; ACC, adenocarcinoma; PHEO, pheochromocytoma; HUmean, mean Hounsfield unit value; HUmax, maximum Hounsfield unit value; vs., versus.

**Supplementary Table 7.** The area under the curve ( $\geq 0.7$ ) of radiomic features for distinguishing adrenal tumor types on precontrast images

|                     |       |             | AUC value | 95% CI      |
|---------------------|-------|-------------|-----------|-------------|
| AA vs. ACC and PHEO | GLCM  | IMC1        | 0.762     | 0.507–0.927 |
|                     | GLRLM | Run entropy | 0.787     | 0.566–1     |
|                     | GLSZM | GLNUN       | 0.725     | 0.452–0.997 |
| ACC vs. AA and PHEO | GLCM  | Correlation | 0.938     | 0.719–0.998 |
|                     |       | IMC 1       | 0.954     | 0.741–0.999 |
|                     |       | IMC 2       | 0.892     | 0.657–0.987 |
|                     |       | MCC         | 0.969     | 0.764–0.997 |
|                     | GLDM  | LGLE        | 0.846     | 0.601–0.970 |
|                     |       | SDLGLE      | 0.831     | 0.653–0.986 |
|                     | GLRLM | Run entropy | 0.908     | 0.677–0.998 |
|                     | GLSZM | GLNUN       | 0.938     | 0.719–0.998 |

AA, adenoma; ACC, adenocarcinoma; PHEO, pheochromocytoma; AUC, area under the curve; CI, confidence interval; GLCM, gray-level co-occurrence matrix; GLDM, gray-level dependence matrix; GLRLM, gray-level run length matrix; GLSZM, gray-level size-zone matrix; IMC1, informational measure of correlation 1; IMC2, informational measure of correlation 2; MCC, maximum correlation coefficient; LGLE, low gray-level emphasis; SDLGLE, small dependence low gray-level emphasis; GLNUN, gray-level non-uniformity normalized; vs., versus.

**Supplementary Table 7.** The area under the curve ( $\geq 0.7$ ) of radiomic features for distinguishing adrenal tumor types on precontrast images (continued)

|                        |       | AUC value   | 95% CI |             |
|------------------------|-------|-------------|--------|-------------|
| PHEO vs.<br>AA and ACC |       | IMC2        | 0.733  | 0.477–0.91  |
|                        | GLCM  | Correlation | 0.800  | 0.575–0.948 |
|                        |       | MCC         | 0.844  | 0.599–0.969 |
|                        | GLDM  | LGLE        | 0.844  | 0.599–0.969 |
|                        |       | SDLGLE      | 0.889  | 0.653–0.986 |
|                        | GLSZM | GLNUN       | 0.733  | 0.477–0.91  |

AA, adenoma; ACC, adenocarcinoma; PHEO, pheochromocytoma; AUC, area under the curve; CI, confidence interval; GLCM, gray-level co-occurrence matrix; GLDM, gray-level dependence matrix; GLSZM, gray-level size-zone matrix; IMC2, informational measure of correlation 2; MCC, maximum correlation coefficient; LGLE, low gray-level emphasis; SDLGLE, small dependence low gray-level emphasis; GLNUN, gray-level non-uniformity normalized; vs., versus
